# Supplementary material
Source: PubMed Central journal article supplement (PMC3140212)
Supplement: NIHMS221993-supplement-1_si_001.pdf [file NIHMS221993-supplement-1_si_001.pdf]

## Supporting Information

# Frequency Domain Detection of Biomolecules using Silicon Nanowire Biosensors

*Gengfeng Zheng,<sup>\*†</sup> Xuan P.A. Gao,<sup>\*‡</sup> and Charles M. Lieber<sup>§,||</sup>*

<sup>†</sup>Laboratory of Advanced Materials and Department of Chemistry, Fudan University, Shanghai, 200433, People's Republic of China, <sup>‡</sup>Department of Physics, Case Western Reserve University, Cleveland, Ohio 44106, <sup>§</sup>Department of Chemistry and Chemical Biology, and <sup>||</sup>Division of Engineering and Applied Science, Harvard University, Cambridge, Massachusetts 02138.

\* Corresponding authors: [gfzheng@fudan.edu.cn](mailto:gfzheng@fudan.edu.cn) and [xuan.gao@case.edu](mailto:xuan.gao@case.edu)

This file contains:

Methods

## Methods

**Nanowire synthesis, device fabrication, and functionalization.** The silicon nanowire (SiNW) synthesis, field-effect transistor (FET) device fabrication, modification of device surfaces with receptors have been described previously.<sup>1</sup> In brief, SiNWs were synthesized by nanocluster-catalyzed chemical vapor deposition, with 20-nm-diameter gold nanoparticles used as catalysts. Silane ( $\text{SiH}_4$ ) and diborane ( $\text{B}_2\text{H}_6$ ) were used as gas reactants, with a B:Si atomic ratio of 1:4000 in gas phase to yield p-type materials. SiNW FET devices were fabricated on a single silicon  $\langle 100 \rangle$  substrate with 600 nm thick  $\text{SiO}_2$  layer. Metal electrode contacts were defined by photolithography, followed by 60 nm Ni metal deposition and subsequent passivation of the Ni contacts with ca. 50 nm thick  $\text{Si}_3\text{N}_4$  layer. The SiNW surfaces were modified with monoclonal antibodies via aldehyde silane conjugation followed by ethanolamine passivation.<sup>1</sup> The prostate specific antigen (PSA) samples were diluted in the assay buffer (100  $\mu\text{M}$  phosphate buffer solution containing 100  $\mu\text{M}$  KCl, pH = 7.4) prior to sensing measurements, and were delivered to the SiNW FET sensor arrays using a flexible PDMS polymer microfluidic channel sealed to the device chip. A typical solution flow rate is 0.4 – 0.5 ml/hour.

**Nanowire sensor measurements.** Conventional time domain conductance measurements were carried out in the voltage-biased mode,<sup>2</sup> in which a constant source-drain voltage (50 mV, either AC or DC) was applied, and the current flowing through the SiNW FET devices was measured by a current pre-amplifier (Model 1211, DL Instruments LLC.). Frequency domain experiments were carried out in the current-biased mode<sup>2</sup> due to larger bandwidth of the voltage

pre-amplifier at the requisite signal gain. A stable current was provided by an Agilent DC voltage supply (full output voltage: 0 – 120 V, typically we used 30 – 60 V) and 500 M $\Omega$  resistor in series with the NW, where the voltage drop across the device was amplified by a voltage amplifier (Model SR560, Stanford Research Systems Inc.) with bandwidth of 1 MHz. The power spectrum of the amplified voltage across NW was then collected by a FFT spectrum analyzer (Model SR760, Stanford Research Systems Inc.).

**Models of frequency domain studies.** Two noise sources were considered for the analysis of noise mechanisms in SiNW FET biosensors: (1) equivalent gate voltage noise from both the biomolecule-receptor binding/unbinding, and (2) thermal fluctuations. First, we analyzed the gate voltage noise induced by biomolecules binding/unbinding on SiNW surface using a two-level model. Second, we considered the gate voltage noise induced by thermal fluctuations when the NW surface has bound biomolecule layers.

**(1) Noise associated with molecule binding/unbinding.** The basic assumptions for this model are (i) a total of  $N$  binding sites (antibody receptors on a given NW device), where (ii)  $N_0$  are conjugated with target antigen molecules, and the effective gate voltage induced by the binding of  $N_0$  antigens is  $V_p$ , and (iii) antigen molecules are independent, and each bound antigen yields an effective gate voltage of  $V_m$ .<sup>3</sup> Modeling the on/off state switching of the single molecule binding/unbinding is similar to the random telegraph signal in a MOSFET.<sup>4</sup> In this context, binding/unbinding of a single antigen molecule yields a Lorentzian power spectral density in gate voltage:

$$\delta V_p^2(f) = \frac{4V_m^2}{(\tau_0 + \tau_1)f_c^2[1 + (2\pi f / f_c)^2]} \quad (1)$$

where  $f_c = 1/\tau_0 + 1/\tau_1$ , and  $\tau_0$ ,  $\tau_1$  stand for the average binding and unbinding times, respectively.

The transition probability (per unit time) from "on" to "off" state is  $1/\tau_1$  and from "off" to "on" state is  $1/\tau_0$ , as shown in Figure S1.

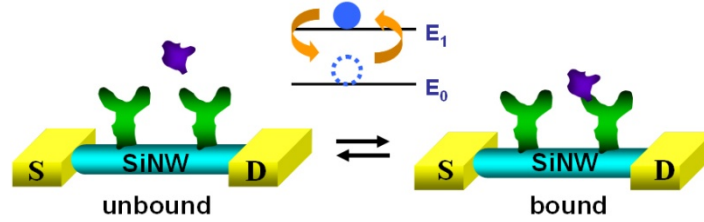

**Figure S1.** Schematic of antigen (purple color) binding and unbinding on a SiNW FET sensor surface functionalized with antibodies (green color), which resembles as a two-level-state system.

The rate equation for  $N$  sites is:

$$\frac{dN_0}{dt} = \frac{1}{\tau_0} \times (N - N_0) - \frac{1}{\tau_1} \times N_0,$$

and yields

$$N_0 = \frac{N / \tau_0}{1 / \tau_0 + 1 / \tau_1}$$

at equilibrium. Comparing to the conventional rate equation:

$$\frac{dN_0}{dt} = k_a c \times (N - N_0) - k_d \times N_0$$

we can associate  $1/\tau_0 = k_a \times c$  and  $1/\tau_1 = k_d$ , with  $c$  as the antigen (PSA) concentration. Thus  $f_c$  in

Eq. (1) should be equivalent to  $(k_a \times c + k_d)$ . This is consistent with the idea of using frequency

spectrum of fluctuations to study chemical reaction rates, proposed more than 30 years ago.<sup>5</sup> Since  $k_a \sim 10^6 \text{ M}^{-1}\text{s}^{-1}$  and  $k_d \sim 10^{-2} \text{ s}^{-1}$  for PSA/antibody conjugation, in the concentration range  $c \leq \text{nM}$ , the calculated  $f_c$  is about  $10^{-2} \text{ Hz}$ . This value is outside the typical frequency range of our measurements (1 Hz – 100 kHz), and is significantly different from our measured characteristic  $\Gamma$  (a few kHz). In addition, due to the existence of  $1/f$  noise background, a  $10^{-2} \text{ Hz}$  plateau would most likely be dominated by the  $1/f$  curve. Under a different molecule recognition system that has a larger  $k_a$  and a higher concentration, it might be possible to achieve a larger  $f_c$ , thus being able to test the applicability of this model.

**(2) Thermal fluctuation driven noise.** By treating the NW-receptor-target layer as a macroscopic system in thermal equilibrium with the environment, we can estimate the gate voltage noise due to the thermal fluctuations.<sup>6,7</sup> The equivalent circuit for the NW FET biosensor is shown in Figure S2. Here we discuss the effect of antigen binding on the gate voltage noise power spectral density using a circuit diagram shown in Figure S2, where  $C_{\text{ox}}$ ,  $C_{\text{ab}}$  and  $C_{\text{dl}}$  are the capacitances of the silicon dioxide, the antibody layer, and the electrical double layer at the NW biosensor-water interface, and  $R_b$  is the resistance of bulk solution between NW and the solution gate. Binding of antigens adds an extra layer of capacitance and resistance between the electrolyte double layer and the antibody-oxide dielectric layer to the NW surface, where  $C_{\text{PSA}}$ ,  $R_{\text{PSA}}$  represent the capacitance and resistance of the PSA layer, respectively.

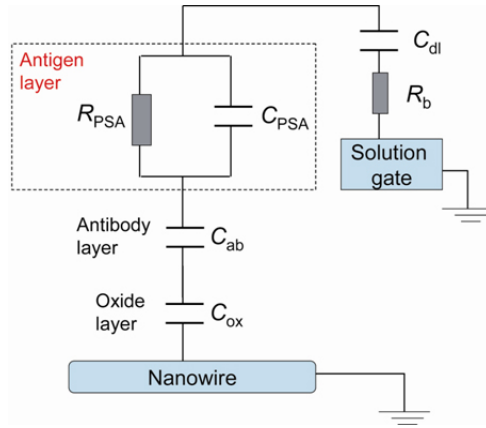

**Figure S2.** Schematic of the equivalent circuit for NW FET biosensor after the binding of antigens (PSAs) on antibodies.

The voltage (Johnson) noise of  $R_{PSA}$  in Figure S2 creates a gate voltage noise  $\delta V_g$ . Because  $\delta V_g$  is coupled to the NW transport through various resistors and capacitances, the  $RC$  time constant  $\tau = RC$  will set a high frequency cutoff in  $S_{V_g}(f)$ , where the power spectral density of  $\delta V_g$  in the frequency domain  $S_{V_g}(f)$  will exhibit a Lorentzian shape with corner frequency  $f_c = 1/2\pi\tau$ , as follows:<sup>6-8</sup>

$$\delta V_g^2(f) = \frac{4k_B TR}{1 + (2\pi f \tau)^2} \quad (2)$$

with  $\tau$  being the overall  $RC$  time constant of Figure S2 determined by the Johnson noise source and the combined capacitance. As the conductivity of an electrolyte solution is much higher than that of protein layers,<sup>9</sup> we assume  $R_b \ll R_{PSA}$ , and get:

$$\tau \approx R_{PSA} [C_{PSA} + 1/(C_{dl}^{-1} + C_{ab}^{-1} + C_{ox}^{-1})] \quad (3)$$

Since all the capacitances in Eq. (3) are on order of fFs for the geometry of NW devices,<sup>10</sup> to obtain  $\tau \sim 0.3$  ms measured in our experiment, the resistance of the antigen layer ( $R_{PSA}$ ) needs to

be on the order of tens of  $G\Omega$ s, which is possible in molecule layers,<sup>11</sup> and consistent with our assumption that  $R_b \ll R_{PSA}$ .

From this analysis, we can see that both the antibody concentration (which determines  $C_{ab}$ ) and the antigen concentration can affect  $f_c$ . However, for antigen concentration  $> 0.15$  pM, the spacing between two neighboring antigen molecules on the NW is smaller than the Debye length of the buffer used ( $\sim 50$  nm). As a result, the capacitance of the antigen layer will saturate for antigen concentrations  $> 0.15$  pM. This explains our observation that the corner frequency of the Lorentzian noise of NW sensor with conjugated PSA-PSA antibody on surface only depends on the coverage density of PSA antibodies, but not PSA in the concentration range tested here.

This model of Lorentzian noise induced by antigen-antibody binding is further supported by the noise spectrum measurements for a different type of antibody-antigen system. Figure S3 shows noise measurement of a SiNW FET sensor in the presence of 0.15, 5 and 150 pM cholera toxin sub-unit B (CTB). Here the SiNW sensor surface was modified with CTB-antibodies under conditions similar to Figure 2 of the main manuscript (the "medium antibody coverage" case). This CTB functionalized sensor exhibits a corner frequency  $f \sim 2500$  Hz in the presence of CTB, quite different from the corner frequency for the PSA sensors ( $f \sim 3800$  Hz). In addition, similar to the PSA sensing experiment, changing the CTB concentration by three orders of magnitude did not lead to a measurable change of the corner frequency  $f$  for CTB concentrations  $> 0.15$  pM. These results further point to the importance of the properties of the biomolecules on the noise spectrum of a NW FET biosensor. In summary, the Lorentzian noise of NW FET biosensors is consistent with the thermal noise of antigen layer bound to the surface of nanowire.

Resistance of  $G\Omega$ s is required for the antigen layer to obtain characteristic corner frequency of kHz for the Lorentzian noise. In the future, a more quantitative understanding of the noise spectra require further detailed understanding of  $C_{ab}$ ,  $C_{PSA}$ , and  $R_{PSA}$ .

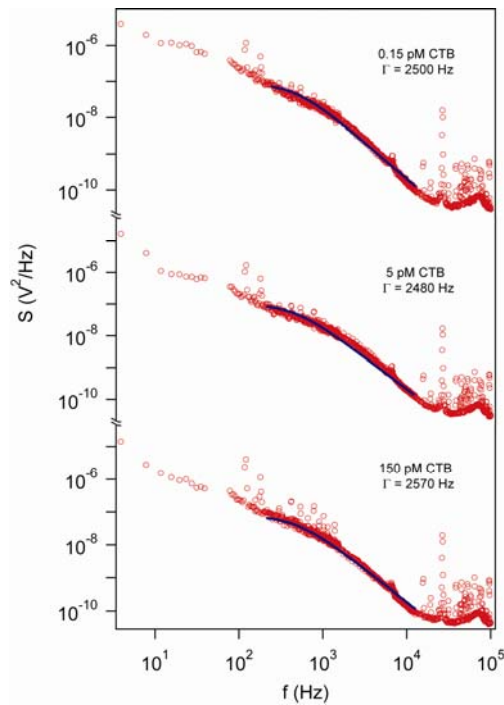

**Figure S3.** The power spectra of the SiNW FET sensor with CTB-antibody modification, in buffer solutions with different CTB concentrations, 0.15 pM, 5 pM, 150 pM. All the spectra show Lorentzian noise with characteristic corner frequency ( $\Gamma$ ) ca. 2500 Hz for all the different CTB concentrations.



## References:

(1) Patolsky, F.; Zheng, G.; Lieber, C. M. *Nat. Protocols* **2006**, *1*, 1711-1724.

(2) Collins, P. G.; Fuhrer, M. S.; Zettl, A. *Appl. Phys. Lett.* **2000**, *76*, 894-896.

(3) It is proper to view the charged molecules on a NW as charges along a line. The gating effects from individual molecules should add in series instead of parallel. So the effective gate voltage from each antigen molecule is not simply  $V_p/N_0$ . Instead, we define this effective gate voltage as  $V_m$ .

(4) Kirton, M. J.; Uren, M. J. *Adv. Phys.* **1989**, *38*, 367-468.

(5) Feher, G.; Weissman, M. *Proc. Natl. Acad. Sci. USA* **1973**, *70*, 870-875.

(6) Hassibi, A.; Navid, R.; Dutton, R. W.; Lee, T. H. *J. Appl. Phys.* **2004**, *96*, 1074-1082; **2005**, *98*, 069903.

(7) In a related system where neuron cells adhered on top of planar silicon transistor, thermal fluctuations were used to explain the extra Lorentzian noise induced by neuron adhesion. Voelker, M.; Fromherz, P. *Phys. Rev. Lett.* **2006**, *96*, 228102.

(8) Note that although  $1/f^2$  type dependence in  $S_{V_g}(f)$  can also be due to charge transfer process at a faradic electrode surface as described in ref. 6, we follow the conventional approach of modeling NW as a non-faradic electrode in which all the noises source originate from the thermal noise of the dissipative (resistive) components in the circuit.

(9) Resistivity of a few nm thick molecular layers is very high ( $>10^{12} \Omega/\text{nm}^2$ , see ref.11).

Therefore, it is reasonable to assume  $R_b \ll R_{\text{PSA}}$ , for the 100  $\mu\text{M}$  buffer solution used.

(10) Garnett, E. C.; Tseng, Y. C.; Khanal D. R.; Wu, J. Q.; Bokor, J.; Yang, P. D. *Nat. Nanotechnol.* **2009**, *5*, 311-314.

(11) Bang, G. S.; Chang, H.; Koo, J. -R.; Lee, T.; Advincula, R. C.; Lee, H. *Small* **2008**, *4*, 1399-1405.
